# Supplementary material for: Hepatic protein-tyrosine phosphatase 1B disruption and pharmacological inhibition attenuate ethanol-induced oxidative stress and ameliorate alcoholic liver disease in mice
Source: PubMed Central journal article supplement — Redox Biol. 2020 Jul 24;36:101658. doi: 10.1016/j.redox.2020.101658 (PMC7408361; doi:10.1016/j.redox.2020.101658), 2020-07-24
Supplement: mmc1.pdf [file mmc1.pdf]

**Supplementary Table 1.****List of antibodies used in immunoblotting and immunofluorescence studies**

| <b>Antibody</b>                                | <b>Host</b>   | <b>Company</b>         | <b>Catalog #</b>  | <b>Dilution</b>               |
|------------------------------------------------|---------------|------------------------|-------------------|-------------------------------|
| <b>PTP1B (mouse)</b>                           | <b>Goat</b>   | <b>R&amp;D Systems</b> | <b>AF3954</b>     | <b>1:2000</b>                 |
| <b>PTP1B (human)</b>                           | <b>Mouse</b>  | <b>Millipore</b>       | <b>MABS197</b>    | <b>1:500 (IF)</b>             |
| <b>GAPDH</b>                                   | <b>Mouse</b>  | <b>Cell Signaling</b>  | <b>3683</b>       | <b>1:5000</b>                 |
| <b>F4/80</b>                                   | <b>Rabbit</b> | <b>Cell Signaling</b>  | <b>70076</b>      | <b>1:500 (IF)</b>             |
| <b>pNF-<math>\kappa</math>B p65<br/>Ser536</b> | <b>Rabbit</b> | <b>Cell Signaling</b>  | <b>3033</b>       | <b>1:5000</b>                 |
| <b>NF-<math>\kappa</math>B p65</b>             | <b>Rabbit</b> | <b>Cell Signaling</b>  | <b>8242</b>       | <b>1:5000</b>                 |
| <b>pAKT Ser473</b>                             | <b>Rabbit</b> | <b>Cell Signaling</b>  | <b>4060</b>       | <b>1:10000</b>                |
| <b>pERK1/2<br/>Thr202/Tyr204</b>               | <b>Rabbit</b> | <b>Cell Signaling</b>  | <b>4370</b>       | <b>1:10000</b>                |
| <b>ERK1/2</b>                                  | <b>Rabbit</b> | <b>Cell Signaling</b>  | <b>4695</b>       | <b>1:10000</b>                |
| <b>AKT</b>                                     | <b>Mouse</b>  | <b>Santa Cruz</b>      | <b>sc-81434</b>   | <b>1:1000</b>                 |
| <b>peNOS Ser1177</b>                           | <b>Rabbit</b> | <b>Santa Cruz</b>      | <b>sc-21871-R</b> | <b>1:1000</b>                 |
| <b>eNOS</b>                                    | <b>Mouse</b>  | <b>Santa Cruz</b>      | <b>sc-376751</b>  | <b>1:1000</b>                 |
| <b>iNOS</b>                                    | <b>Mouse</b>  | <b>Santa Cruz</b>      | <b>sc-7271</b>    | <b>1:1000</b>                 |
| <b>SOD1</b>                                    | <b>Mouse</b>  | <b>Santa Cruz</b>      | <b>sc-271014</b>  | <b>1:2000</b>                 |
| <b>GPx1/2</b>                                  | <b>Mouse</b>  | <b>Santa Cruz</b>      | <b>sc-133160</b>  | <b>1:2000</b>                 |
| <b>CYP2E1</b>                                  | <b>Rabbit</b> | <b>Abcam</b>           | <b>ab28146</b>    | <b>1:10000</b>                |
| <b>NOX2</b>                                    | <b>Rabbit</b> | <b>Abcam</b>           | <b>ab129068</b>   | <b>1:2500</b>                 |
| <b>NOX4</b>                                    | <b>Rabbit</b> | <b>Abcam</b>           | <b>ab216654</b>   | <b>1:2500</b>                 |
| <b>4-HNE</b>                                   | <b>Rabbit</b> | <b>Abcam</b>           | <b>ab46545</b>    | <b>1:3000,<br/>1:500 (IF)</b> |

**Supplementary Table 2.****List of primer sequences used in quantitative real-time PCR**

| <b>Gene</b>     | <b>Forward</b>                 | <b>Reverse</b>                  | <b>Size (bp)</b> |
|-----------------|--------------------------------|---------------------------------|------------------|
| <b>h-PTPN1</b>  | <b>CGACCAGCTGCGCTTCTC</b>      | <b>GTCCCCCATGATGAATTTGG</b>     | <b>61</b>        |
| <b>h-B2M</b>    | <b>TTCTGGCCTGGAGGCTATC</b>     | <b>TCAGGAAATTTGACTTTCCATTC</b>  | <b>86</b>        |
| <b>m-Il1b</b>   | <b>TAGCTTCAGGCAGGCAGTATC</b>   | <b>TAAGGTCCACGGGAAAGACAC</b>    | <b>79</b>        |
| <b>m-Ccl2</b>   | <b>CCCAATGAGTAGGCTGGAGA</b>    | <b>TCTGGACCCATTCTTCTTG</b>      | <b>125</b>       |
| <b>m-Tnfa</b>   | <b>TGACGTGGAAGTGGCAGAAGAG</b>  | <b>TTGCCACAAGCAGGAATGAGA</b>    | <b>104</b>       |
| <b>m-Adgre1</b> | <b>CTTTGGCTATGGGCTTCCAGTCC</b> | <b>GCAAGGAGGACAGAGTTTATCGTG</b> | <b>165</b>       |
| <b>m-Ly6g</b>   | <b>TGCGTTGCTCTGGAGATAGA</b>    | <b>CAGAGTAGTGGGGCAGATGG</b>     | <b>90</b>        |
| <b>m-Pparg</b>  | <b>TCTTAACTGCCGGATCCACAA</b>   | <b>GCCCAAACCTGATGGCATT</b>      | <b>104</b>       |
| <b>m-Srebf1</b> | <b>GAGCCATGGATTGCACATTT</b>    | <b>CTCAGGAGAGTTGGCACCTG</b>     | <b>143</b>       |
| <b>m-Fasn</b>   | <b>GGAGGTGGTGATAGCCGGTAT</b>   | <b>TGGGTAATCCATAGAGCCCAG</b>    | <b>140</b>       |
| <b>m-Cd36</b>   | <b>GATGACGTGGCAAAGAACAG</b>    | <b>TCCTCGGGGTCCTGAGTTAT</b>     | <b>107</b>       |
| <b>m-Scd</b>    | <b>TTCTTGCGATACACTCTGGTGC</b>  | <b>CGGGATTGAATGTTCTTGTCGT</b>   | <b>98</b>        |
| <b>m-Tbp</b>    | <b>TGAGAGCTCTGGAATTGTAC</b>    | <b>CTTATTCTCATGATGACTGCAG</b>   | <b>147</b>       |

# Supplementary Figure S1

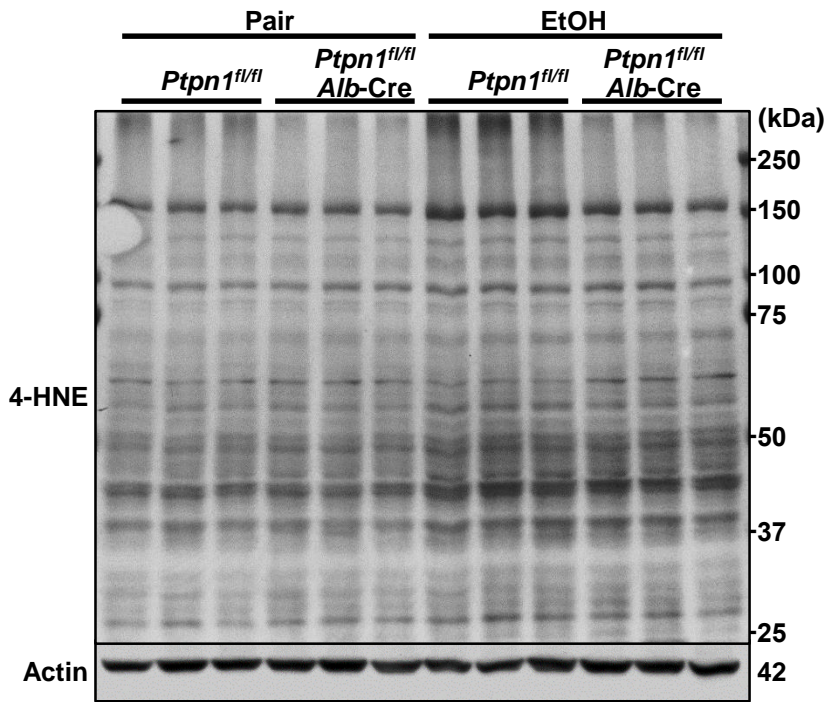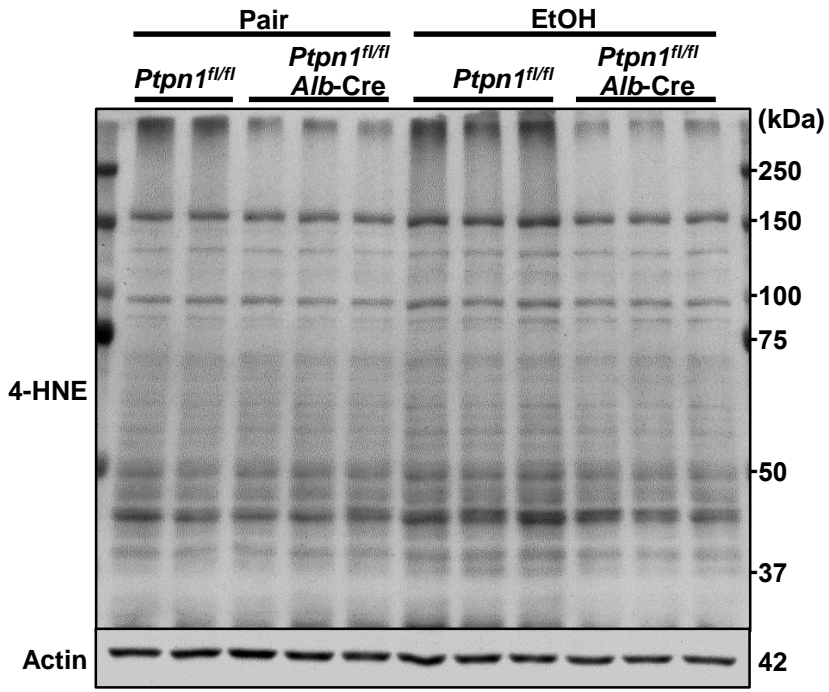

**Supplementary Fig. S1.** Ctrl (*Ptpn1<sup>fl/fl</sup>*) and KO (*Ptpn1<sup>fl/fl</sup>, Alb-Cre*) female mice were used in the chronic plus binge model. Pair: control diet + maltose gavage, EtOH: ethanol diet + ethanol gavage. Two sets of 4-HNE and Actin immunoblots in hepatic lysates are presented, and each lane represents an independent animal.
